# Supplementary material
Source: HighWire-hosted journal article supplement (https://jnis.bmj.com/content/neurintsurg-2018-014286)
Supplement: inline-supplementary-material-1 [file inline-supplementary-material-1.docx]

Table 3: Inter-group comparisons of distances and time metrics for each period

|  | p(A/B/C) | | | | | |
| --- | --- | --- | --- | --- | --- | --- |
|  | -04/2015 | | | 05/2015- | | |
|  | **A vs B** | **A vs C** | **B vs C** | **A vs B** | **A vs C** | **B vs C** |
| distances (km) - onset to |  |  |  |  |  |  |
| initial hospital | >.999 | >.999 | >.999 | .181 | >.999 | .146 |
| CSC | .667 | <.0001 | <.0007 | .292 | <.0001 | <.0001 |
| time metrics (min) - onset to |  |  |  |  |  |  |
| initial imaging | .81 | >.999 | >.999 | >.999 | >.999 | .976 |
| door-in-door-out§ |  |  | .986 |  |  | .661 |
| total referral time∥ |  |  | .135 |  |  | .021 |
| imaging CSC | .782 | <.0001 | .04 | <.0001 | <.0001 | .001 |
| puncture | >.999 | <.0001 | .14 | .019 | <.0001 | .058 |
| picture-to-puncture time CSC ¶ | .323 | .0004 | .323 | .019 | .0004 | .94 |
| recanalization | .938 | <.0001 | .0009 | .008 | <.0001 | .008 |
| picture-to-recanalization time CSC* | .207 | .038 | .874 | >.999 | >.999 | >.999 |
| picture-to-recanalization time PSC~ |  |  | .0006 |  |  | .0008 |

CSC, comprehensive stroke centre; §door-in-door-out time: time interval from admission to discharge at the referring hospital; ∥total referral time: overall referral/transfer process including door-in-door-out time and ground transfer to the CSC; ¶picture-to-puncture time: time interval between CT scan and groin puncture at the CSC; *picture-to-recanalization time CSC: time interval between CSC CT scan and angiographic recanalization;~picture-to-recanalization time PSC: time interval between PSC CT scan and angiographic recanalization
